# Supplementary material for: Dual Epigenetic Regulation of ERα36 Expression in Breast Cancer Cells
Source: PubMed Central journal article supplement (PMC6600239; doi:10.3390/ijms20112637), 2019-05-29
Supplement: ijms-20-02637-s001.pdf [file ijms-20-02637-s001.pdf]

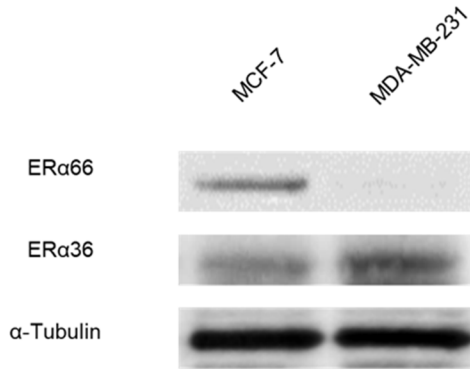

**Figure S1: Representative image of MCF-7 or MDA-MB-231 cells submitted to western blotting as described previously [10].** We used the primary antibodies anti-ERα66 (anti-ERα-F10, Santa Cruz Biotechnology) and anti-ERα36 (anti-ERα-G20, Santa Cruz Biotechnology). The anti-α-Tubulin (GTX102079, Genetex) was used as a loading control. Protein expression profiles were revealed with Clarity Western ECL Substrate (Biorad).

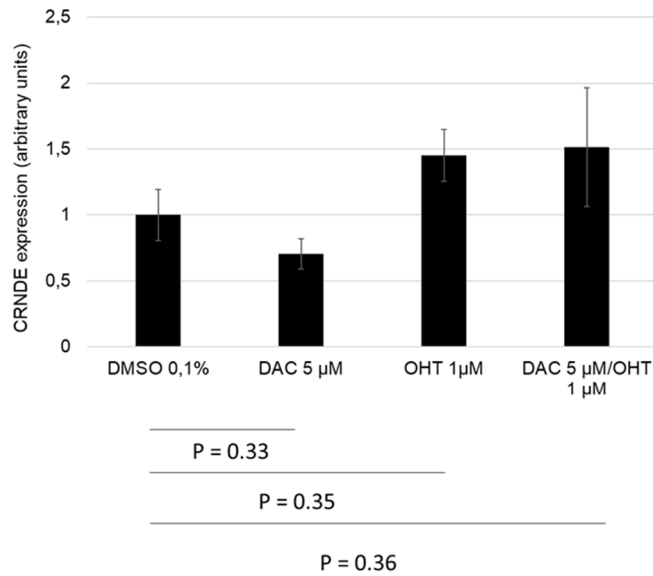

**Figure S2: Expression of CRNDE after 48h treatment with DAC, OHT or DAC+OHT as measured by RT-qPCR.**

MCF-7 cells were treated for 48h with DMSO 0.1% (as control), DAC 5 μM, OHT 1μM or by a combination OHT 1μM/DAC 5μM. CRNDE expression was measured by RT-qPCR analysis. Each bar represents mean ± S.E.M. N ≥ 3. \*: P <0.05

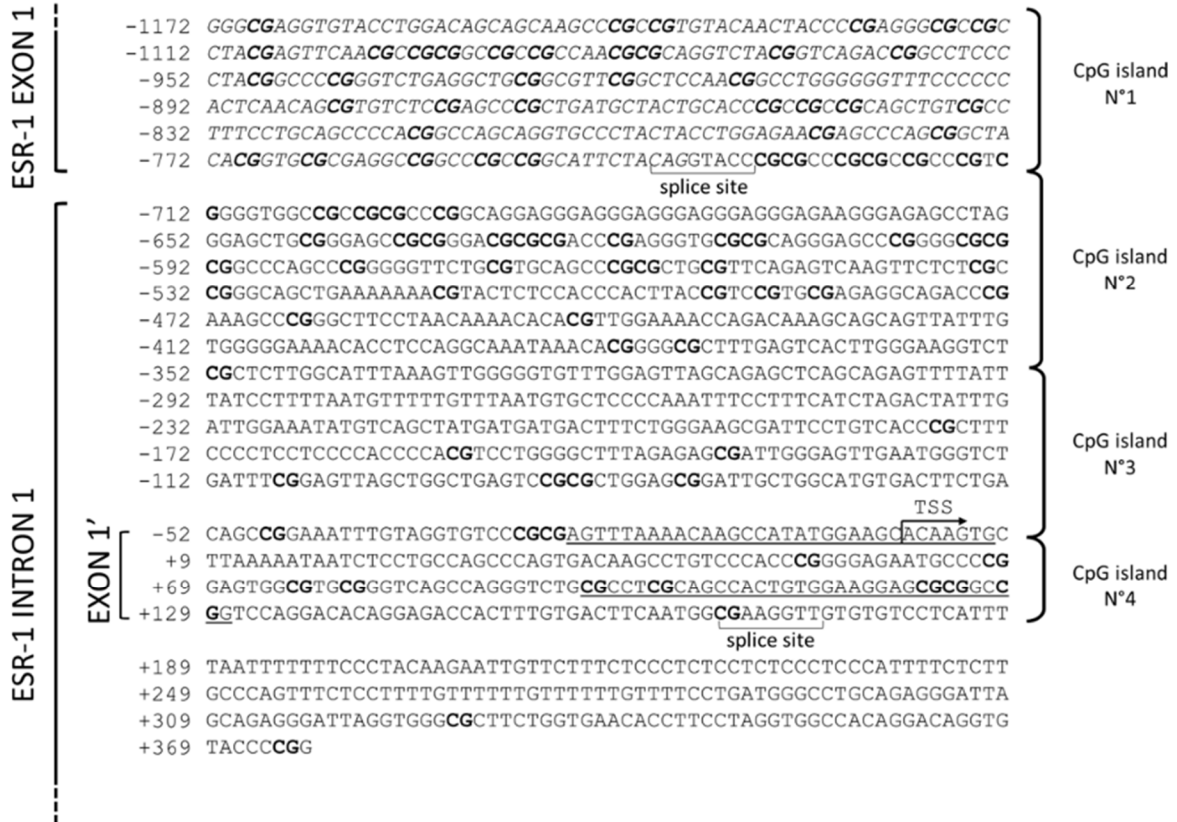

**Figure S3. Exon1/intron1 part of ESR1 genomic sequence.**

(>gi|224589818|ref|NC\_000006.11|:152129448-152130362 Homo sapiens chromosome 6, GRCh37.p10 Primary Assembly). Exon1 sequence is italicized and refers to the canonical ER $\alpha$ 66 transcribed sequence while exon 1' refers to the variant ER $\alpha$ 36. Nucleotides are numbered from ER $\alpha$ 36 transcription start site (TSS, arrow). Exon1/intron1 and exon1'/intron1 splice sites are annotated and CpG dinucleotides are in bold. The use of EMBOSS CpG plot ([http://www.ebi.ac.uk/Tools/seqstats/emboss\\_cpgplot/](http://www.ebi.ac.uk/Tools/seqstats/emboss_cpgplot/)) allowed to design four ESR1 genomic regions as CpG islands on both sides of (i) the ESR-1 exon1/intron1 boundary (CpG islands No.1 and 2, respectively) and (ii) the ER $\alpha$ 36 transcription start site (CpG islands No.3 and 4). PCR primers used for CpG island amplification after bisulfite conversion are underlined.
